# Supplementary material for: In vivo characterization of protein uptake by yeast cell envelope: single cell AFM imaging and μ-tip-enhanced Raman scattering study
Source: Royal Society of Chemistry journal article supplement (doi:10.1039/c3an00362k), 2013-01-01

## Electronic Supplementary Information

- 1) AFM force - displacement curves for wild-type (non-modified) and genetically modified yeast cells. Cells were characterized by AFM (NTEGRA Spectra system, NT-MDT Inc., Russia) in 'upright' configuration in the contact mode using CSG10 cantilevers with a force constant of  $0.1 \text{ Nm}^{-1}$ .

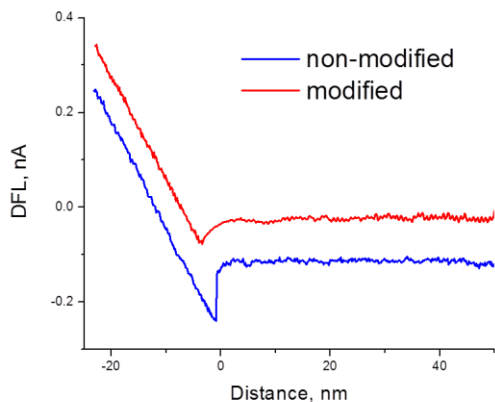

- 2) AFM images. Cells were characterized by AFM (NTEGRA Spectra system, NT-MDT Inc., Russia) in 'upright' configuration in the tapping mode using commercial silicon cantilevers NSG11 with a force constant of  $5 \text{ Nm}^{-1}$  at a scan rate of typically 1 Hz.

Wild-type yeast cells: 2D topography (left) and phase images (right).

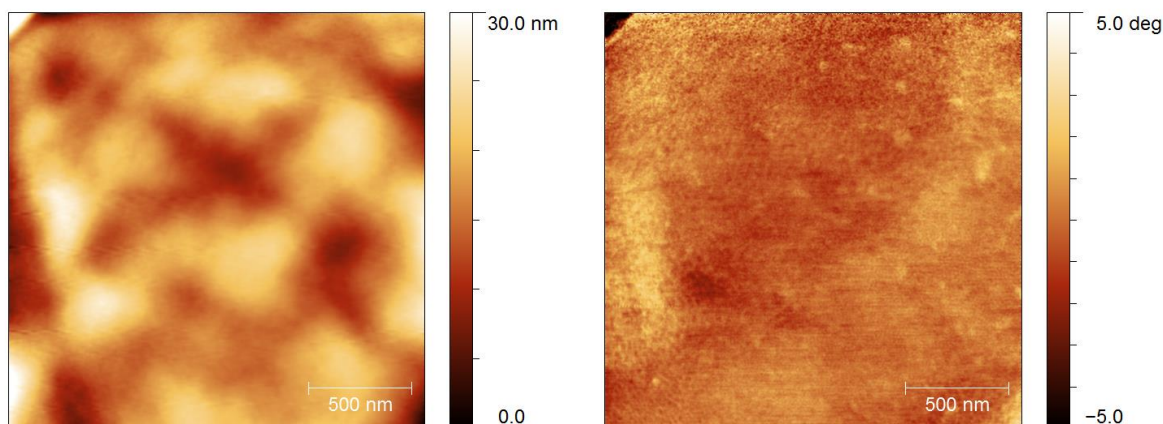

Genetically modified yeast cells: 2D topography (left) and phase images (right).

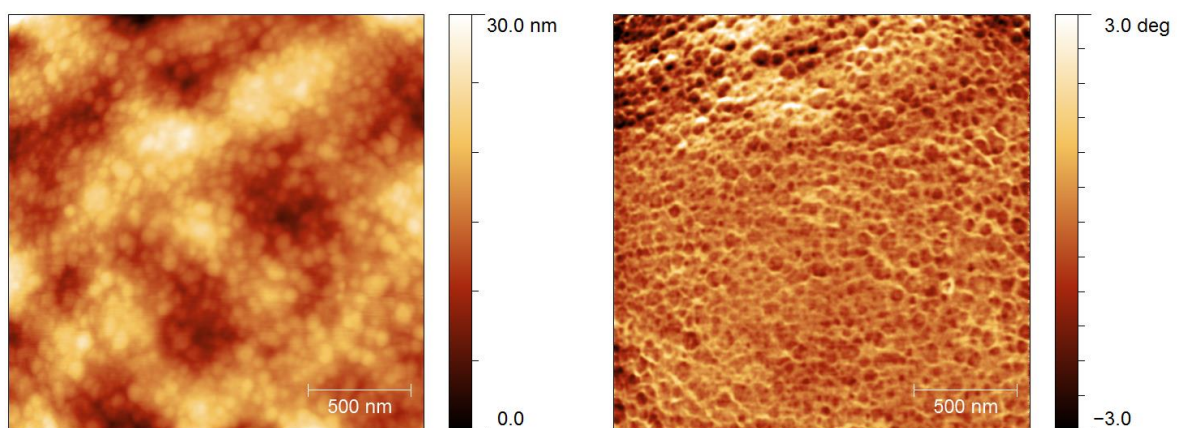

Supplement: c3an00362k.pdf [file c3an00362k.pdf]
